# Supplementary material
Source: Springer Nature journal article supplement (https://www.springermedizin.de/resource/supplementary/12885_2013_4139_MOESM5_ESM.pdf/9465532)

## A: Tumor tissue RNA

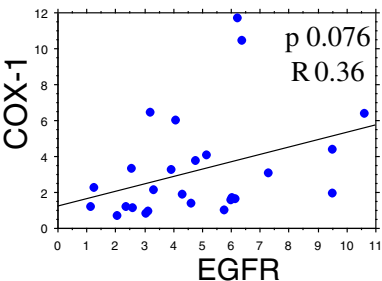

## B: Tumor tissue protein

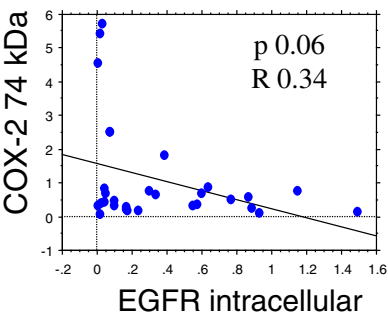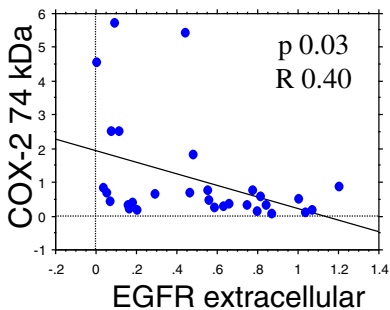

## C: Mucosa tissue protein

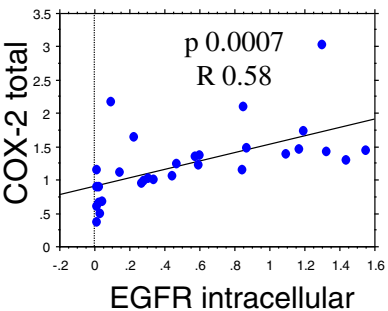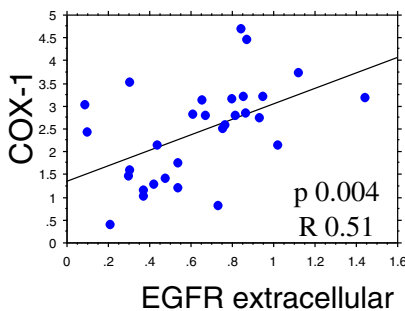

Supplement: MOESM5 [file 9465532]
